# Supplementary material
Source: PubMed Central journal article supplement (PMC6420231)
Supplement: NIHMS992986-supplement-SI2.pdf [file NIHMS992986-supplement-SI2.pdf]

**Supporting Information 2**

**Validating Molecular Dynamics Simulations Against Experimental  
Observables in Light of Underlying Conformational Ensembles**

Matthew Carter Childers and Valerie Daggett\*

Department of Bioengineering, University of Washington, Seattle, WA 98195-5013, United  
States

## AMBER Input Files

### Minimization

Minimization Stage 1

```
&cntrl  
  imin=1,  
  ntmin=1,  
  maxcyc=1000,  
  ncyc=500,  
  ntx=1,  
  ntf=1,  
  ntp=1,  
  ntt=1,  
  cut=10,  
  ntr=1,  
  restraint_wt=100,  
  restraintmask=':1-56',  
  iwrap=1,  
  ntxo=2,  
  ntpr=50,  
  ntwr=50,  
/
```

Minimization Stage 2

```
&cntrl  
  imin=1,  
  ntmin=1,  
  maxcyc=1000,  
  ncyc=500,  
  ntx=1,  
  irest=0,  
  ntpr=50,  
  ntwr=50,  
  iwrap=1,  
  ntf=1,  
  ntp=1,  
  ntt=1,  
  cut=10,  
  ntr=1,  
  ntxo=2,  
  restraint_wt=100,  
  restraintmask=':1-56 & !@H',  
/
```

### Minimization Stage 3

```
&cntrl  
  imin=1,  
  ntmin=1,  
  maxcyc=1000,  
  ncyc=500,  
  ntx=1,  
  ntpr=50,  
  ntwr=50,  
  iwrap=1,  
  ntf=1,  
  ntp=1,  
  ntt=1,  
  ntxo=2,  
  cut=10,  
  ntr=1,  
  restraint_wt=25,  
  restraintmask=':1-56@CA',  
/
```

## Heating

Heating Stage 1

```
&cntrl  
  imin = 0,  
  irect = 0,  
  ntx = 1,  
  ntc = 2,  
  ntf = 2,  
  ntp = 1,  
  cut = 10.0,  
  tempi = 0.0,  
  temp0 = 50.0,  
  ntt = 1,  
  tautp=1.0,  
  nstlim = 25000,  
  dt = 0.002,  
  iwrap = 1,  
  ntpr = 50,  
  ntwx = 50,  
  ntwr = 500,  
  nscm = 1000,  
  ntr=1,  
  restraint_wt=25,  
  restraintmask=':1-56@CA',  
  ig=-1,  
  ioutfm=1,  
  ntxo=2,  
/
```

## Heating Stage 2

```
&cntrl
  imin = 0,
  irect = 1,
  ntx = 5,
  ntc = 2,
  ntf = 2,
  ntp = 1,
  cut = 10.0,
  temp0 = 100.0,
  ntt = 1,
  tautp=1.0,
  nstlim = 25000,
  dt = 0.002,
  iwrap = 1,
  ntpr = 50,
  ntwx = 50,
  ntwr = 500,
  nscm = 1000,
  ntr=1,
  restraint_wt=25,
  restraintmask=':1-56@CA',
  ig=-1,
  ioutfm=1,
  ntxo=2,
/
```

### Heating Stage 3

```
&cntrl
  imin = 0,
  irect = 1,
  ntx = 5,
  ntc = 2,
  ntf = 2,
  ntp = 1,
  cut = 10.0,
  temp0 = 150.0,
  ntt = 1,
  tautp=1.0,
  nstlim = 25000,
  dt = 0.002,
  iwrap = 1,
  ntpr = 50,
  ntwx = 50,
  ntwr = 500,
  nscm = 1000,
  ntr=1,
  restraint_wt=25,
  restraintmask=':1-56@CA',
  ig=-1,
  ioutfm=1,
  ntxo=2,
/
```

Heating Stage 4

```
&cntrl  
  imin = 0,  
  irect = 1,  
  ntx = 5,  
  ntc = 2,  
  ntf = 2,  
  ntp = 1,  
  cut = 10.0,  
  temp0 = 200.0,  
  ntt = 1,  
  tautp=1.0,  
  nstlim = 25000,  
  dt = 0.002,  
  iwrap = 1,  
  ntp = 50,  
  ntwx = 50,  
  ntwr = 500,  
  nscm = 1000,  
  ntr=1,  
  restraint_wt=25,  
  restraintmask=':1-56@CA',  
  ig=-1,  
  ioutfm=1,  
  ntxo=2,  
/
```



Heating Stage 5

```
&cntrl  
  imin = 0,  
  irect = 1,  
  ntx = 5,  
  ntc = 2,  
  ntf = 2,  
  ntp = 0,  
  cut = 10.0,  
  temp0 = 250.0,  
  ntt = 1,  
  tautp=1.0,  
  nstlim = 25000,  
  dt = 0.002,  
  iwrap = 1,  
  ntpr = 50,  
  ntwx = 50,  
  ntwr = 500,  
  nscm = 1000,  
  ntr=1,  
  restraint_wt=25,  
  restraintmask=':1-56@CA',  
  ig=-1,  
  ioutfm=1,  
  ntxo=2,  
/
```

Heating Stage 6

```
&cntrl
  imin = 0,
  irect = 1,
  ntx = 5,
  ntc = 2,
  ntf = 2,
  ntp = 1,
  cut = 10.0,
  temp0 = 298.0,
  ntt = 1,
  tautp=1.0,
  nstlim = 25000,
  dt = 0.002,
  iwrap = 1,
  ntp = 50,
  ntwx = 50,
  ntwr = 500,
  nscm = 1000,
  ntr=1,
  restraint_wt=25,
  restraintmask=':1-56@CA',
  ig=-1,
  ioutfm=1,
  ntxo=2,
/
```

## Equilibration

Equilibration Stage 1

```
&cntrl  
  imin=1,  
  ntmin=1,  
  maxcyc=1000,  
  ncyc=500,  
  ntx=5,  
  irect=1,  
  ntt=1,  
  tautp=1.0,  
  ntpr=50,  
  ntwr=50,  
  iwrap=1,  
  ntf=1,  
  cut=10.0,  
  ntr=1,  
  restraint_wt=5,  
  restraintmask=':1-56@CA',  
/
```

## Equilibration Stage 2

```
&cntrl  
  imin=1,  
  ntmin=1,  
  maxcyc=1000,  
  ncyc=500,  
  ntx=1,  
  irect=0,  
  ntt=1,  
  tautp=1.0,  
  ntpr=50,  
  ntwr=50,  
  iwrap=1,  
  ntf=1,  
  cut=10.0,  
  ntr=1,  
  restraint_wt=4,  
  restraintmask=':1-56@CA',  
/
```

### Equilibration Stage 3

```
&cntrl  
  imin=1,  
  ntmin=1,  
  maxcyc=1000,  
  ncyc=500,  
  ntx=1,  
  irect=0,  
  ntt=1,  
  tautp=1.0,  
  ntpr=50,  
  ntwr=50,  
  iwrap=1,  
  ntf=1,  
  cut=10.0,  
  ntr=1,  
  restraint_wt=3,  
  restraintmask=':1-56@CA',  
/
```

#### Equilibration Stage 4

```
&cntrl
  imin=1,
  ntmin=1,
  maxcyc=1000,
  ncyc=500,
  ntx=1,
  irest=0,
  ntt=1,
  tautp=1.0,
  ntpr=50,
  ntwr=50,
  iwrap=1,
  ntf=1,
  cut=10.0,
  ntr=1,
  restraint_wt=2,
  restraintmask=':1-56@CA',
/
```

## Equilibration Stage 5

```
&cntrl  
  imin=1,  
  ntmin=1,  
  maxcyc=1000,  
  ncyc=500,  
  ntx=1,  
  irest=0,  
  ntt=1,  
  tautp=1.0,  
  ntpr=50,  
  ntwr=50,  
  iwrap=1,  
  ntf=1,  
  cut=10.0,  
  ntr=1,  
  restraint_wt=1,  
  restraintmask=':1-56@CA',  
/
```

## Equilibration Stage 6

```
&cntrl
  imin=0,
  ntp=50,
  ntwx=500,
  ntwr=500,
  iwrap=1,
  ntx=1,
  irect=0,
  ntf=2,
  ntc=2,
  cut=10.0,
  nstlim=500000,
  dt=0.002,
  nscm=1000,
  temp0=298.0,
  tempi=298.0,
  ntt=1,
  ntp=0,
  ntb=1,
  ntr=1,
  restraint_wt=0.5,
  restraintmask=':1-56@CA',
  ig=-1,
  ioutfm=1,
  ntxo=2,
/
```



## Equilibration Stage 7

```
&cntrl
  imin=0,
  ntp=50,
  ntwx=500,
  ntwr=500,
  iwrap=1,
  ntx=1,
  irect=0,
  ntf=2,
  ntc=2,
  cut=10.0,
  nstlim=500000,
  dt=0.002,
  nscm=1000,
  temp0=298.0,
  tempi=298.0,
  ntt=1,
  ntp=1,
  tautp=0.2,
  ntr=1,
  restraint_wt=0.5,
  restraintmask=':1-56@CA',
  ig=-1,
  ioutfm=1,
  ntxo=2,
/
```

## Production Dynamics

Production Dynamics

```
imin=0,  
irest=1,  
ntx=5,  
nstlim=500000,  
dt=0.002,  
ntc=2,  
ntf=2,  
ntt=3,  
gamma_ln=1.0,  
temp0=298.0,  
ntpr=50000,  
ntwx=500,  
ntwr=50000,  
ntp=1,  
iwrap=1,  
cut=10.0,  
ntr=0,  
ntxo=2,  
ioutfm=1,  
ig=-1
```

/

## GROMACS Input Files

### Minimization

```
integrator      = steep
emtol           = 1000.0
emstep         = 0.005
nsteps         = 50000
nstlist        = 1
cutoff-scheme  = Verlet
ns_type        = grid
coulombtype    = PME
rcoulomb       = 1.0
rvdw           = 1.0
pbc            = xyz
```

## Equilibration

### NPT Equilibration

```
define                = -DPOSRES
integrator            = md
nsteps               = 50000
dt                   = 0.002
nstxout              = 500
nstvout              = 50000
nstenergy            = 50000
nstlog               = 50000
continuation         = yes
constraint_algorithm = lincs
constraints           = all-bonds
lincs_iter           = 1
lincs_order          = 4
cutoff-scheme        = Verlet
ns_type              = grid
nstlist              = 10
rcoulomb             = 1.0
rvdw                 = 1.0
coulombtype          = PME
pme_order            = 4
fourierspacing       = 0.16
tcoupl               = V-rescale
tc-grps              = Protein Non-Protein
tau_t                = 0.5 0.5
ref_t                = 298 298
pcoupl               = Parrinello-Rahman
pcoupltype           = isotropic
tau_p                = 2.0
ref_p                = 1.0
compressibility       = 4.5e-5
refcoord_scaling     = com
pbc                  = xyz
DispCorr              = EnerPres
gen_vel              = no
```

## NVT Equilibration

```
define                = -DPOSRES
integrator            = md
nsteps               = 50000
dt                   = 0.002
nstxout              = 500
nstvout              = 500
nstenergy            = 500
nstlog               = 500
continuation         = no
constraint_algorithm = lincs
constraints          = all-bonds
lincs_iter           = 1
lincs_order          = 4
cutoff-scheme        = Verlet
ns_type              = grid
nstlist              = 10
rcoulomb             = 1.0
rvdw                 = 1.0
coulombtype          = PME
pme_order            = 4
fourierspacing       = 0.16
tcoupl               = V-rescale
tc-grps              = Protein Non-Protein
tau_t                = 0.5 0.5
ref_t                = 298 298
pcoupl               = no
pbc                  = xyz
DispCorr             = EnerPres
gen_vel              = yes
gen_temp             = 298
gen_seed             = -1
```

## Production Dynamics

```
integrator           = md
nsteps              = 500000
dt                  = 0.002
nstxout             = 1000
nstvout             = 5000
nstenergy           = 5000
nstlog              = 5000
nstxout-compressed  = 5000
compressed-x-grps   = System
continuation        = yes
constraint_algorithm = lincs
constraints          = all-bonds
lincs_iter          = 1
lincs_order         = 4
cutoff-scheme       = Verlet
ns_type             = grid
nstlist             = 10
rcoulomb            = 1.0
rvdw                = 1.0
coulombtype         = PME
pme_order           = 4
fourierspacing      = 0.16
tcoupl              = V-rescale
tc-grps             = Protein Non-Protein
tau_t               = 0.5      0.5
ref_t               = 298      298
pcoupl              = Parrinello-Rahman
pcoupltype          = isotropic
tau_p               = 2.0
ref_p               = 1.0
compressibility     = 4.5e-5
pbc                 = xyz
DispCorr            = EnerPres
gen_vel             = no
```

## **//mm Input Files**

### **Minimization**

```
<?xml version='1.0'?>
<workbook xmlns="http://inlucemmolecularmechanics/workbook" mmpI_uri="file://1enh.xml">
  <add count="1" molecule="1enh">
    <chain id="A"/>
  </add>

  <pdb_read filename="1enh_preH.pdb"/>

  <hydrogen operation="add" select="1enh"/>

  <go steps="500">
    <sdmin select="@H="/>
    <log granularity="100"/>
  </go>

  <pdb_write filename="1enh_Hmin.pdb"/>

  <set name="mechanics" value="bond_pbadi angle_pbadi torsion_pbadi nonbonded_plus_pbadi" type="string"/>
  <set name="pbadi_count" value="10" type="integer"/>
  <go steps="1000">
    <sdmin/>
    <log granularity="100"/>
  </go>

  <chirality/>

  <pdb_write filename="min.pdb"/>

</workbook>
```

## Equilibration

```
<?xml version='1.0'?>
<workbook xmlns="http://inlucemmolecularmechanics/workbook" mmpl_uri="file://../1enh.xml">

  <set name="mechanics" value="bond_pbadi angle_pbadi torsion_pbadi nonbonded_plus_pbadi" type="string"/>
  <set name="pbadi_count" value="10" type="integer"/>

  <add count="1" molecule="1enh">
    <chain id="A"/>
  </add>

  <pdb_read filename="../min.pdb"/>

  <solvate water_pdb="/net/programs/ilmm/lib/h2o/298K.pdb" depth="10.0" density="0.997075"
radius_of_exclusion="1.8"/>

  <go steps="1000">
    <sdmin select="WAT"/>
    <log granularity="100"/>
  </go>
  <reset/>

  <go steps="500">
    <dynamics select="WAT"/>
    <thermostat temperature="298" heating_degrees="0.1" random_seed="1"/>
    <log granularity="100"/>
  </go>
  <reset/>

  <go steps="500">
    <sdmin select="WAT"/>
    <log granularity="100"/>
```



```
</go>  
<reset/>
```

```
<go steps="500">  
  <sadmin select="~WAT"/>  
  <log granularity="100"/>  
</go>  
<reset/>
```

```
<pdb_write filename="start.pdb" write_solvent="true"/>  
<mdr_write filename="start.mdr"/>
```

```
</workbook>
```

## Production Dynamics

```
<?xml version='1.0'?>
<workbook xmlns="http://inlucemmolecularmechanics/workbook" mmp_uri="file://1enh.xml">

  <add count="1" molecule="1enh">
    <chain id="A"/>
  </add>
  <add count="2912" molecule="WAT"/>

  <mdr_read filename="checkpoint.mdr"/>

  <go steps="5000000" hours="8">
    <dynamics/>
    <thermostat temperature="298" heating_degrees="0.1000" random_seed="1"/>
    <log granularity="500"/>
    <mdc_writer_multi_file steps_per_file="500000" granularity="500" error_maximum="0.0005"/>
    <mdr_writer granularity="500000" checkpoint_granularity="50000" checkpoint_filename="checkpoint.mdr"/>
  </go>

  <mdr_write filename="checkpoint.mdr"/>

</workbook>
```

## NAMD Input Files

### Minimization

#### Minimization Phase 1

```
#####  
## MAIN MD CONFIGURATION DESCRIPTION ##  
#####  
  
# Protein in a 10A Water Box TIP3P  
  
set temperature 298  
  
#####  
## SIMULATION PARAMETERS ##  
#####  
  
# Input  
paraTypeCharmm on  
parameters ./par_all27_prot_lipid.inp  
temperature $temperature  
  
# Force-Field Parameters  
exclude scaled1-4  
1-4scaling 1.0  
cutoff 10.0  
switching on  
switchdist 9.0  
pairlistdist 14.0  
  
# Integrator Parameters  
timestep 2.0  
rigidBonds all  
nonbondedFreq 1  
fullElectFrequency 2  
stepspercycle 10  
  
# Constant Temperature Control  
langevin on  
langevinDamping 5  
langevinTemp $temperature  
langevinHydrogen off  
  
# Output  
restartsave yes  
binaryrestart yes  
restartfreq 500
```

```
dcdfreq          500
outputEnergies   100
outputPressure   100
outputMomenta    100
outputTiming     1000
```

```
#####
## EXTRA PARAMETERS                                     ##
#####
```

```
cellBasisVector1  47.0    0.0    0.0
cellBasisVector2   0.0   50.5    0.0
cellBasisVector3   0.0    0.0   47.8
cellOrigin         0.0    0.0    0.0
```

```
wrapAll          on
wrapNearest      on
PME               yes
PMEGridSpacing   1
useGroupPressure yes
useFlexibleCell  no
useConstantArea  no
langevinPiston   on
langevinPistonTarget 1.01325
langevinPistonPeriod 100.
langevinPistonDecay 50.
langevinPistonTemp $temperature
binaryoutput     no
```

```
#####
## ADJUSTABLE PARAMETERS                               ##
#####
```

```
set pdbfilename  lenh_wb
set inputname    min1
set outputname   min1
structure        $pdbfilename.psf
coordinates      $pdbfilename.pdb
outputname       min/$outputname
restartName      res/$outputname.res
```

```
firsttimestep    0
numsteps         20000
```

```
#####  
## EXECUTION SCRIPT ##  
#####  
  
# Minimization with all protein fixed to allow solvent to relax  
fixedAtoms      on  
fixedAtomsFile  $pdbfilename\_fixprotein.pdb  
fixedAtomsCol   B  
output          min/$outputname  
minimize        20000  
  
puts [format "STATUS: Completed Minimization with protein fixed:  
%s" ALL]
```

## Minimization Phase 2

```
#####  
## MAIN MD CONFIGURATION DESCRIPTION ##  
#####  
  
# Protein in a 10A water box TIP3P  
  
set temperature 298  
  
#####  
## SIMULATION PARAMETERS ##  
#####  
  
# Input  
paraTypeCharmm on  
parameters ./par_all27_prot_lipid.inp  
temperature $temperature  
  
# Force-Field Parameters  
exclude scaled1-4  
1-4scaling 1.0  
cutoff 10.0  
switching on  
switchdist 9.0  
pairlistdist 14.0  
  
# Integrator Parameters  
timestep 2.0  
rigidBonds all  
nonbondedFreq 1  
fullElectFrequency 2  
stepspercycle 10  
  
# Constant Temperature Control  
langevin on  
langevinDamping 5  
langevinTemp $temperature  
langevinHydrogen off  
  
# Output  
restartsave yes  
binaryrestart yes  
restartfreq 5000  
dcdfreq 500  
outputEnergies 100  
outputPressure 100
```

```
outputMomenta      100
outputTiming       1000
```

```
#####
## EXTRA PARAMETERS                                     ##
#####
cellBasisVector1   47.0    0.0    0.0
cellBasisVector2   0.0    50.5    0.0
cellBasisVector3   0.0    0.0    47.8
cellOrigin         0.0    0.0    0.0
```

```
wrapAll            on
wrapNearest        on
PME                yes
PMEGridSpacing     1
useGroupPressure   yes
useFlexibleCell    no
useConstantArea    no
langevinPiston     on
langevinPistonTarget 1.01325
langevinPistonPeriod 100.
langevinPistonDecay 50.
langevinPistonTemp $temperature
binaryoutput       no
```

```
#####
## ADJUSTABLE PARAMETERS                               ##
#####
```

```
set pdbfilename    lenh_wb
set inputname      min1
set outputname     min2
set outputname2    min3
structure          $pdbfilename.psf
coordinates        min/$inputname.coor
outputname         min/$outputname
restartName        res/$outputname.res
```

```
firsttimestep     0
numsteps           1000
```

```
#####
## EXECUTION SCRIPT                                     ##
#####
```

```
fixedAtomsForces yes
fixedAtoms      on
fixedAtomsfile  $pdbfilename\_fixbb.pdb
fixedAtomsCol   B
minimize        1000

puts [format "STATUS: Completed Minimization with protein fixed:
%s" BACKBONE]

# Minimization with nothing fixed and start to calculate forces
between all atoms
outputname      min/$outputname2
fixedAtoms      no
minimize        1000

puts [format "STATUS: Completed Minimization with protein fixed:
%s" NONE]
```



## Heating

```
#####  
## MAIN MD CONFIGURATION DESCRIPTION ##  
#####  
  
# Protein in a Truncated Octahedron TIP3P  
  
set temperature      298  
  
#####  
## SIMULATION PARAMETERS ##  
#####  
  
# Input  
paraTypeCharmm      on  
parameters          ./par_all127_prot_lipid.inp  
temperature         $temperature  
  
# Force-Field Parameters  
exclude             scaled1-4  
1-4scaling          1.0  
cutoff              10.0  
switching           on  
switchdist          9.0  
pairlistdist        14.0  
  
# Integrator Parameters  
timestep            2.0  
rigidBonds          all  
nonbondedFreq       1  
fullElectFrequency  2  
stepspercycle       10  
  
# Constant Temperature Control  
langevin            on  
langevinDamping     5  
langevinTemp        $temperature  
langevinHydrogen    off  
  
# Output saving frequencies  
restartsave         yes
```

```
binaryrestart      yes
restartfreq       500
dcdfreq           500
outputEnergies    100
outputPressure    100
outputMomenta     100
outputTiming      1000
```

```
#####
## EXTRA PARAMETERS                                     ##
#####
```

```
cellBasisVector1  47.0    0.0    0.0
cellBasisVector2   0.0   50.5    0.0
cellBasisVector3   0.0    0.0   47.8
cellOrigin         0.0    0.0    0.0
```

```
wrapAll           on
wrapNearest       on
```

```
PME               yes
PMEGridSpacing    1
```

```
useGroupPressure  yes
useFlexibleCell   no
useConstantArea   no
```

```
langevinPiston    on
langevinPistonTarget 1.01325
langevinPistonPeriod 100.
langevinPistonDecay 50.
langevinPistonTemp  $temperature
binaryoutput       no
```

```
#####
## ADJUSTABLE PARAMETERS                               ##
#####
```

```
set pdbfilename   lenh_wb
set inputname     min3
set outputname    heat
set temperature   298
```

```
structure         $pdbfilename.psf
coordinates       min/$inputname.coor
outputName        heat/$outputname
```

```

restartName          res/$outputname.res

firsttimestep       0

#####
## EXECUTION SCRIPT                                     ##
#####
puts [format "STATUS: Heating with restraints gradually
decreased: %s" NONE]

reassignFreq        100
reassignTemp        0
reassignIncr        30
reassignHold        $temperature

#Harmonic restraints on protein backbone
constraints         on
consRef             $pdbfilename\_fixbb.pdb
consKFile           $pdbfilename\_fixbb.pdb
consKcol            B

set k_init 5.0
for {set i 0} {$i<=10} {incr i 1} {
set ck [expr {$k_init - $i*0.5}]
constraintScaling $ck
run 1000
}

puts [format "STATUS: Heating stage complete"]

```

## Equilibration

```
#####  
## MAIN MD CONFIGURATION DESCRIPTION ##  
#####
```

```
# Protein in a 10A water box TIP3P
```

```
set temperature      298
```

```
#####  
## SIMULATION PARAMETERS ##  
#####
```

```
# Input  
paraTypeCharmm      on  
parameters          ./par_all127_prot_lipid.inp
```

```
# Force-Field Parameters  
exclude             scaled1-4  
1-4scaling          1.0  
cutoff              10.0  
switching           on  
switchdist          9.0  
pairlistdist        14.0
```

```
# Integrator Parameters  
timestep            2.0  
rigidBonds          all  
nonbondedFreq       1  
fullElectFrequency  2  
stepspercycle       10
```

```
# Constant Temperature Control  
langevin            on  
langevinDamping     5  
langevinTemp        $temperature  
langevinHydrogen    off
```

```
# Output saving frequencies  
restartsave         yes  
binaryrestart       yes  
restartfreq         500  
dcdfreq             500
```

```
outputEnergies      100
outputPressure      100
outputMomenta       100
outputTiming        1000
binaryoutput        no
```

```
#####
```

```
## EXTRA PARAMETERS ##
```

```
#####
```

```
cellBasisVector1   47.0    0.0    0.0
cellBasisVector2    0.0    50.5    0.0
cellBasisVector3    0.0    0.0    47.8
cellOrigin          0.0    0.0    0.0
```

```
wrapAll            on
wrapNearest        on
PME                 yes
PMEGridSpacing     1
useGroupPressure   yes
useFlexibleCell    no
useConstantArea    no
langevinPiston     on
langevinPistonTarget 1.01325
langevinPistonPeriod 100.
langevinPistonDecay 50.
langevinPistonTemp $temperature
```

```
#####
```

```
## ADJUSTABLE PARAMETERS ##
```

```
#####
```

```
set pdbfilename    lenh_wb
set inputname      heat
set outputname     eqm

structure          $pdbfilename.psf
coordinates        heat/$inputname.coor
outputName         eqm/$outputname
restartName        res/$outputname.res
velocities         heat/$inputname.vel
extendedSystem     heat/$inputname.xsc

firsttimestep      0
```

```
#####  
## EXECUTION SCRIPT ##  
#####  
constraints off  
  
run 100000  
puts [format "STATUS: NPT equilibration stage complete"]
```

## Production Dynamics

```
#####  
## MAIN MD CONFIGURATION DESCRIPTION ##  
#####  
set temperature      298  
  
#####  
## SIMULATION PARAMETERS ##  
#####  
# Input  
paraTypeCharmm      on  
parameters          ./par_all127_prot_lipid.inp  
  
# Force-Field Parameters  
exclude              scaled1-4  
1-4scaling           1.0  
cutoff               10.0  
switching            on  
switchdist           9.0  
pairlistdist         14.0  
  
# Integrator Parameters  
timestep             2.0  
rigidBonds           all  
nonbondedFreq        1  
fullElectFrequency   2  
stepspercycle        10  
  
# Constant Temperature Control  
langevin              on  
langevinDamping       5  
langevinTemp          $temperature  
langevinHydrogen      off  
  
# Output saving frequencies  
restartsave           yes  
binaryrestart         yes  
restartfreq           500  
dcdfreq              500  
outputEnergies        100  
outputPressure        100  
outputMomenta         100  
outputTiming          1000
```

```

#####
## EXTRA PARAMETERS                                     ##
#####
cellBasisVector1    47.0    0.0    0.0
cellBasisVector2    0.0    50.5    0.0
cellBasisVector3    0.0    0.0    47.8
cellOrigin          0.0    0.0    0.0

wrapAll             on
wrapNearest        on
PME                 yes
PMEGridSpacing     1
useGroupPressure   yes
useFlexibleCell    no
useConstantArea    no
binaryoutput       yes

#####
## ADJUSTABLE PARAMETERS                               ##
#####

set pdbfilename    lenh_wb
set inputname      eqm
set outputname     prod

structure          $pdbfilename.psf
coordinates        eqm/$inputname.coor
velocities         eqm/$inputname.vel
extendedSystem     eqm/$inputname.xsc
outputName         prod/$outputname\_0
restartName        res/$outputname.res

firsttimestep      0

#####
## EXECUTION SCRIPT                                   ##
#####

constraints off
run 50000

```
